# Supplementary material
Source: Springer Nature journal article supplement (https://www.springermedizin.de/resource/supplementary/12879_2010_1340_MOESM4_ESM.pdf/9442388)

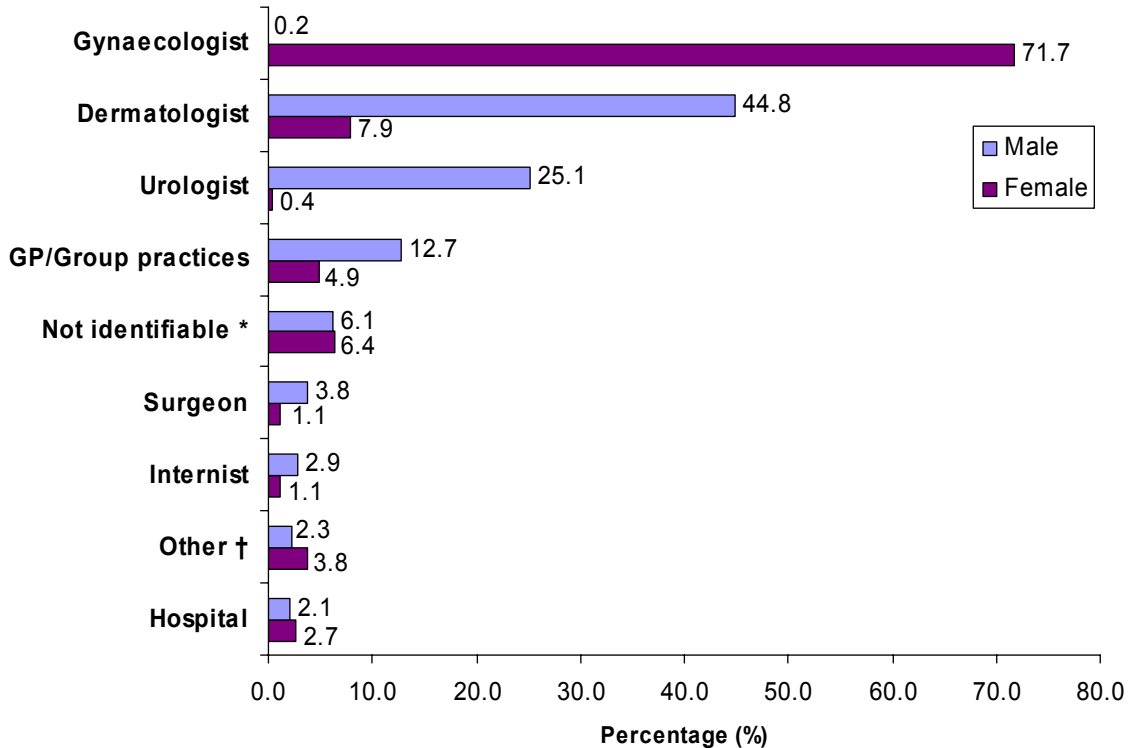

Supplement: MOESM4 [file 9442388]
